# Supplementary material for: ZmMADS47 Regulates Zein Gene Transcription through Interaction with Opaque2
Source: PubMed Central journal article supplement (PMC4831773; doi:10.1371/journal.pgen.1005991), 2016-04-14

S6 Fig

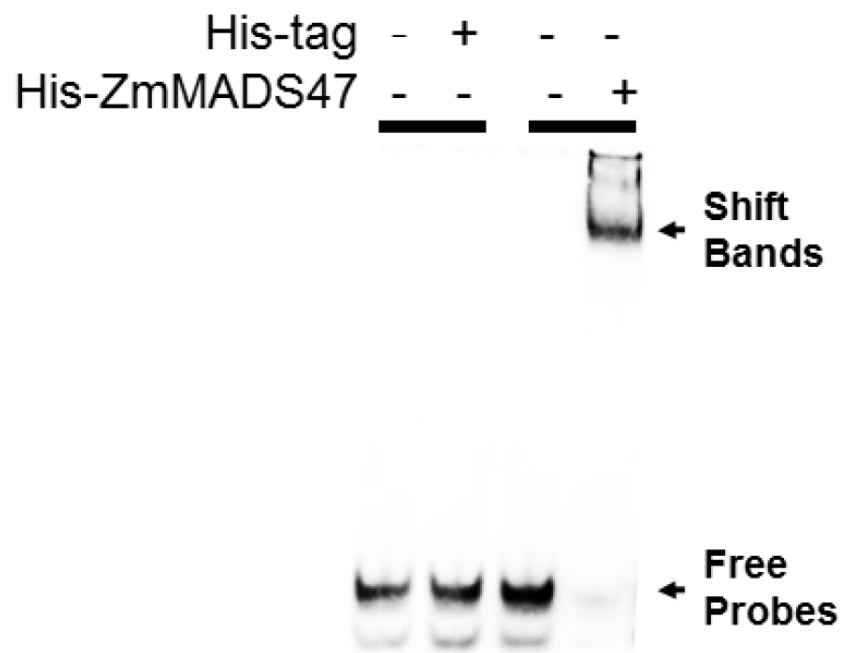

Supplement: pgen.1005991.s006.pdf [file pgen.1005991.s006.pdf]
