# Supplementary material for: ZmMADS47 Regulates Zein Gene Transcription through Interaction with Opaque2
Source: PubMed Central journal article supplement (PMC4831773; doi:10.1371/journal.pgen.1005991), 2016-04-14
Supplement: pgen.1005991.s007.pdf [file pgen.1005991.s007.pdf]

## S7 Fig

### Z1A promoter

gaatcgtgccatgatttttttctagtggaaaatagccaaaccaagcaacacatatgtg  
O2 binding site (Z1) MADS binding site (Z2)  
gctatcgttacacatgtgtaaaggattgcatcacacattgtcaccatgtatgtg  
acaataccgagaggaaaaaccacttatttattgtattatacaagttgtcttgctta  
cgtataaattataaccaacaagtaatcactaaatgtcaaaaccaactagataccat  
gtcatctctaccttacttactaatatctttttgcaaaatcaaaaattaatcttgca  
caagcacaaggactgagatgtgtataaatatctcttaaattagtagc taatatacgc  
acatatattgagaccaactagcaacatagaaagcacaatagtgtaaccaaca

### 50kD promoter

MADS47 binding site  
tgagagcaatggtatgcaaatcctttgcatgtacgcaaaactagc tagttgtcacaag  
ttgtatatcgattcgtcgcgtttcaacaactcatgcaacattacaacaagtaacaca  
atattacaaagttagtttcatacaaagcaagaaaaggacaataatacttgacatgtaa  
O2 binding site  
agtgaagcttattatacttctaatccaacacaaaaacaaaaaaagtgcacaaaggt  
caaaaatccacatcaaccattaacctatacgtaaagtgagtgatgagtcacattatc  
caacaaatgtttatcaatgtggtatcatacaagcattgacatccataaatgcaagaa  
attgtgccaacaaagctataagtaacctcatatgtatttgcactcatgcatcacaaa  
acatccttctatcagttaccatcaatcatcattcatcttagtagtatagggaccaaac  
aaatctgcaacatcaattatctaactcaaaaacca
