# Supplementary material for: ZmMADS47 Regulates Zein Gene Transcription through Interaction with Opaque2
Source: PubMed Central journal article supplement (PMC4831773; doi:10.1371/journal.pgen.1005991), 2016-04-14
Supplement: pgen.1005991.s011.pdf [file pgen.1005991.s011.pdf]

**S1 Table.** Gene ontology classifications of DEGs with functional annotation in *ZmMADS47* RNAi transgenic line.

|                      | <b>Gene ID</b>   | <b>Annotation</b>                            | <b>Fold-change</b> | <b>P-value</b> |
|----------------------|------------------|----------------------------------------------|--------------------|----------------|
| GO:0009611           | GRMZM2G423898    | unknown                                      | 1.51               | 0.048          |
| response to wounding | AC199487.4_FG003 | unknown                                      | 4115226.33         | 4.04E-13       |
| P-value: 0.00392     | GRMZM2G024827    | unknown                                      | 1314060.45         | 0.00029        |
|                      | GRMZM2G012806    | subtilisin-chymotrypsin inhibitor CI-1B      | -1.74              | 1.84E-38       |
|                      | AC209765.3_FG001 | unknown                                      | 1364256.48         | 0.00029        |
|                      | GRMZM2G012928    | unknown                                      | -2.96              | 2.96E-171      |
| GO:0009652           | GRMZM2G368861    | Defensin-like protein 2 (Gamma-zeathionin-2) | -1.84              | 1.63E-10       |
| defense response     | GRMZM2G115340    | unknown                                      | -1.81              | 0.0045         |
| P-value: 0.00213     | GRMZM2G368890    | Defensin-like protein 1 (Gamma-zeathionin-1) | -1.5               | 5.75E-07       |
|                      | GRMZM2G179248    | unknown                                      | -1.74              | 0.0077         |
|                      | AC196417.3_FG008 | unknown                                      | 1.49               | 0.0020         |
|                      | AC208126.3_FG001 | gamma-thionins family protein                | -1.72              | 0.012          |

|                                                  |               |                                                                    |       |          |
|--------------------------------------------------|---------------|--------------------------------------------------------------------|-------|----------|
|                                                  | GRMZM2G419675 | unknown                                                            | -5.34 | 0.00029  |
| GO:0044262                                       | GRMZM2G443833 | unknown                                                            | 2.5   | 0        |
| cellular<br>carbohydrate<br>metabolic<br>process | GRMZM2G007404 | unknown                                                            | 2.08  | 0.0072   |
| P-value:<br>0.00392                              | GRMZM2G102183 | Malate synthase,<br>glyoxysomal (EC<br>2.3.3.9)                    | -2.51 | 0.0017   |
|                                                  | GRMZM2G068506 | unknown                                                            | 1.54  | 1.52E-24 |
|                                                  | GRMZM2G071630 | Glyceraldehyde-3-<br>phosphate<br>dehydrogenase,<br>cytosolic 3    | 1.47  | 1.01E-05 |
|                                                  | GRMZM2G044027 | unknown                                                            | 1.52  | 0.028    |
|                                                  | GRMZM2G026980 | xyloglucan<br>endotransglycosylase<br>homolog1                     | -2.63 | 0.024    |
|                                                  | GRMZM2G064302 | Enolase 1 (2-<br>phosphoglycerate<br>dehydratase 1)                | 1.49  | 6.38E-09 |
|                                                  | GRMZM2G176307 | cytosolic<br>glyceraldehyde-3-<br>phosphate<br>dehydrogenase GAPC4 | 1.54  | 6.02E-15 |
|                                                  | GRMZM2G141399 | starch synthase DULL1                                              | 1.49  | 0.0032   |
|                                                  | GRMZM2G119175 | Glycoside hydrolase,<br>subgroup, catalytic core                   | 1.43  | 0.012    |

|                                          |                  |                                                           |       |           |
|------------------------------------------|------------------|-----------------------------------------------------------|-------|-----------|
|                                          | GRMZM2G089713    | Sucrose synthase 1<br>(Shrunken-1)                        | 1.52  | 5.18E-12  |
|                                          | GRMZM2G406945    | unknown                                                   | 7.14  | 0.030     |
|                                          | GRMZM2G018820    | unknown                                                   | -1.45 | 0.0040    |
| GO:0045735                               | GRMZM2G045387    | Zein seed storage<br>protein                              | -1.77 | 2.94E-71  |
| Description: nutrient reservoir activity | GRMZM2G088365    | Zein seed storage<br>protein                              | -4.47 | 0         |
| P-value:1.37E-20                         | GRMZM2G160739    | Zein seed storage<br>protein                              | -1.51 | 7.38E-56  |
|                                          | GRMZM2G060429    | Bifunctional<br>inhibitor/plant lipid<br>transfer protein | 1.41  | 2.34E-11  |
|                                          | GRMZM2G044152    | Zein seed storage<br>protein                              | -1.6  | 7.68E-72  |
|                                          | AF546187.1_FG007 | Zein seed storage<br>protein                              | -1.84 | 1.51E-112 |
|                                          | GRMZM2G388461    | Zein seed storage<br>protein                              | -1.7  | 1.14E-08  |
|                                          | AF546188.1_FG003 | Zein seed storage<br>protein                              | -1.7  | 0.0043    |
|                                          | GRMZM2G026703    | RmlC-like jelly roll<br>fold;Cupin 1                      | -1.89 | 5.89E-35  |

|                  |                                                  |       |           |
|------------------|--------------------------------------------------|-------|-----------|
| GRMZM2G346897    | Zein seed storage protein                        | -1.89 | 0         |
| GRMZM2G346895    | Zein seed storage protein                        | -1.71 | 9.01E-29  |
| GRMZM2G397687    | Zein seed storage protein                        | -1.52 | 0         |
| GRMZM2G067919    | RmlC-like jelly roll fold;Cupin 1                | -1.83 | 2.27E-21  |
| AF546187.1_FG001 | Zein seed storage protein                        | -2.06 | 3.55E-193 |
| GRMZM2G088273    | Zein seed storage protein                        | -2.71 | 0.00090   |
| GRMZM2G008913    | Zein seed storage protein                        | -1.71 | 0.0018    |
| AF546188.1_FG007 | Zein seed storage protein                        | -1.55 | 0         |
| GRMZM2G089493    | hypothetical protein LOC100191708                | -4    | 0.020     |
| GRMZM2G008341    | Zein seed storage protein                        | 1.64  | 0.027     |
| GRMZM2G044625    | Zein-alpha PZ22.3 Precursor (22 kDa zein PZ22.3) | -1.48 | 3.16E-304 |

|                                                                     |                  | Zein-alpha ZA1/M1                               |            |            |
|---------------------------------------------------------------------|------------------|-------------------------------------------------|------------|------------|
|                                                                     | GRMZM2G044152    | Precursor (22 kDa zein<br>ZA1/M1)               | -1.6       | 7.68E-72   |
|                                                                     | GRMZM2G138689    | unknown                                         | -1.44      | 1.20E-133  |
|                                                                     | GRMZM2G332259    | Rapid ALkalinization<br>Factor                  | 4.35       | 0.0098     |
| GO:0004867                                                          | GRMZM2G423898    | Proteinase inhibitor I13,<br>potato inhibitor I | 1.52       | 0.048      |
| Description: ser<br>ine-type<br>endopeptidase<br>inhibitor activity | GRMZM2G156632    | Proteinase inhibitor I12,<br>Bowman-Birk        | -1.9       | 0.00000025 |
| P-value:<br>0.000948                                                | AC199487.4_FG003 | Proteinase inhibitor I13,<br>potato inhibitor I | 4115226.34 | 4.04E-13   |
|                                                                     | GRMZM2G024827    | Proteinase inhibitor I13,<br>potato inhibitor I | 1314060.45 | 0.00029    |
|                                                                     | GRMZM2G012806    | Proteinase inhibitor I13,<br>potato inhibitor I | -1.74      | 1.84E-38   |
|                                                                     | AC209765.3_FG001 | Proteinase inhibitor I13,<br>potato inhibitor I | 1364256.48 | 0.00029    |
|                                                                     | GRMZM2G012928    | Proteinase inhibitor I13,<br>potato inhibitor I | -2.96      | 2.96E-171  |

---
