# Supplementary material for: ZmMADS47 Regulates Zein Gene Transcription through Interaction with Opaque2
Source: PubMed Central journal article supplement (PMC4831773; doi:10.1371/journal.pgen.1005991), 2016-04-14
Supplement: pgen.1005991.s012.pdf [file pgen.1005991.s012.pdf]

**S2 Table.** Probes used for EMSA.

---

|          |                                                      |
|----------|------------------------------------------------------|
| z1A-8    | atattattgagaccaactagcaacatagaaagcacaatagtgaccaaca    |
| z1A-7    | gactgagatgtgtataaatactcttaaattagtagctaataatcgcac     |
| z1A-6    | tactaatattcttttgcaaaatccaaaattaatcttgcaacaagcacaag   |
| z1A-5    | atcactaaatgtcaaaaccaactagataccatgtcatctctaccttatct   |
| z1A-4    | attatatcaagttgtcttgcttacgtataaattataaccaacaaagta     |
| z1A-3    | tcacccatgtatttgacaataccgagaggaaaaaccactattttattgt    |
| z1A-2    | catatgtggctatcggtacacatgtgtaaaggattgcatcacaccattg    |
| z1A-1    | gaatcgtgcatgattttttctagtggaatagccaaaccaagcaaca       |
| 19kD-Z1  | tcttaaaccgattattacacaagttaaccacactaaaattaacaatggt    |
| 19kD-Z2  | gaatcgtgcatgattttttctagtggaatagccaaaccaagcaaca       |
| 50kD-1   | gcaaatcctttgcatgtacgcaaaactagctagttgtcacaagttgtata   |
| 50kD-2   | agcaagaaaaggacaataatactgacatgtaaagtgaagcttataacttcta |
| Z2-Mu1   | cacaccattgtgccatgtatttgacaa                          |
| Z2-Mu2   | cacaccattgtcattcatgtatttgacaa                        |
| Z2-Mu3   | cacaccattgtcacctgtgtatttgacaa                        |
| Z2-Mu4   | cacaccattgtcacccacatatttgacaa                        |
| Z2-Mu5   | cacaccattgtcacccatgctgttgacaa                        |
| Z2-Mu6   | cacaccattgtcacccatgtacctggacaa                       |
| Z2-Mu7   | cacaccattgtcacccatgtatccggacaa                       |
| 19kD 6-1 | gaaaaaccactattttattgt                                |
| 19kD 6-2 | tcacccatgtatttgacaataccgagag                         |
| 19kD 7-1 | ggattgcatcacaccattg                                  |
| 19kD 7-2 | catatgtggctatcggtacacatgtgtaaa                       |

---
