# Supplementary material for: ZmMADS47 Regulates Zein Gene Transcription through Interaction with Opaque2
Source: PubMed Central journal article supplement (PMC4831773; doi:10.1371/journal.pgen.1005991), 2016-04-14
Supplement: pgen.1005991.s013.pdf [file pgen.1005991.s013.pdf]

**S3 Table.** Primers involved in this paper.

|                                                         |                  |                                      |
|---------------------------------------------------------|------------------|--------------------------------------|
| <b>Yeast two hybrid interaction</b>                     | BD-ZmMADS47      | CGGAATTCATGGTCGGGACCGGGAAGA          |
|                                                         |                  | CGGGATCCTCACTTGGAGCTGAAGAGTGGTA      |
|                                                         | AD-O2(bZIP)      | GGGAATTCCATATGGTGGTGCCGAACTCTTGTTG   |
|                                                         |                  | TCCCCGGGGTCGTTGTACTTCTGGTTCA         |
| <b>Pull-down and antibody preparation</b>               | His-O2           | CGCCATGGATGGAGCACGTCATCTCAATG        |
|                                                         |                  | CGGTCGACATACATGTCCATGTGTATGGC        |
|                                                         | GST-ZmMADS47     | CGGAATTCATGGTCGGGACCGGGAAGA          |
|                                                         |                  | CGGCGGCCGCTCACTTGGAGCTGAAGAGTGGTA    |
| <b>Sub-cellular localization</b>                        | CFP-ZmMADS47(FI) | CGGAATTCATGGTCGGGACCGGGAAGA          |
|                                                         |                  | CGCCCGGGTCACTTGGAGCTGAAGAGTGGTA      |
|                                                         | CFP-ZmMADS47(C)  | GCGAATTCAAACACGGATGTGAGGATGGA        |
|                                                         |                  | GCCCCGGGTCACTTGGAGCTGAAGAGTG         |
| <b>Transactivation testing in yeast</b>                 | BD-ZmMADS47(N)   | GCCCATGGAATGGTCGGGACCGGGAAGAG        |
|                                                         |                  | GCGAATTCCTTGGAATGAGAGTCGTACC         |
|                                                         | BD-ZmMADS47(K)   | GCCCATGGAATACGACTCTCATTCCAAGAC       |
|                                                         |                  | GCGAATTCCACTTGCTCCTTCAGCCTTG         |
|                                                         | BD-ZmMADS47(C)   | GCCCATGGAACACGGATGTGAGGATGGA         |
|                                                         |                  | GCGAATTCTCACTTGGAGCTGAAGAGTG         |
| <b>RNAi line construction</b>                           | ZmMADS47(RN Ai)  | GCGGATCCATTTAAATAGCAGGTAATCGATCGGTAC |
|                                                         |                  | GCTCTAGACCATGGTCGATCAGCTGCGTTCTCTT   |
| <b>EMSA</b>                                             | His-ZmMADS47     | CGCCATGGATGGTCGGGACCGGGAAGA          |
|                                                         |                  | CGGTCGACTCACTTGGAGCTGAAGAGTGGTA      |
| <b>Transactivation testing in onion epidermal cells</b> | 35S:O2           | CGCCCGGGATGGAGCACGTCATCTCAATG        |
|                                                         |                  | CGGAATTCATACATGTCCATGTGTATGGC        |
|                                                         | 35S:ZmMADS47     | CGCCCGGGATGGTCGGGACCGGGAAGA          |
|                                                         |                  | CGGAATTCTCACTTGGAGCTGAAGAGTGGTA      |
|                                                         | P19Kd(z1A)       | GCAAGCTTACTTCTAAGAATTTGGTATGCCAGT    |

|                      |  |                                     |
|----------------------|--|-------------------------------------|
|                      |  | GCGCGGCCGCTCACTCGATCCCCACCGATA      |
| P19Kd(z1B)           |  | GCAAGCTTTTCTAGGGTACCAGGCCTCC        |
|                      |  | GCGCGGCCGCTGCAGAAAGAGCAAGGAGCA      |
| P22Kd(z1C)           |  | GCAAGCTTTCCGGTATGCACTGAAAGCA        |
|                      |  | GCGCGGCCGCGCTCAAAATATTATGGGTGATGGTT |
| P19Kd(z1D)           |  | GCAAGCTTATCAACTCTTGTTTCATCATT       |
|                      |  | GCGCGGCCGCTGGTGCTAAGATGTTGCTAG      |
| P14kd                |  | GCAAGCTTTGCTGCCCTGCTGGAATAAA        |
|                      |  | GCGCGGCCGCTAACGCTTAGACCACTGGAAGC    |
| P27kd                |  | GCCTCGAGTCTCTGTGTGCAAAGAAACA        |
|                      |  | GCGCGGCCGCGGGTTCTTCTGCGCTCTGG       |
| P50Kd                |  | GCGTCGACTTGAGAGCAATGGTATGCAAATCCT   |
|                      |  | CGGGATCCGGTTTTTTGGAGTTAGATAATTGATG  |
| P10Kd                |  | GCGTCGACCCGTATAAGAGGGCTAAGATCTAAT   |
|                      |  | CGGGATCCGGCGGTGGTGTCTTCTTCTCTAGA    |
| 35S:O2(Mu)           |  | GCCCCGGGATGACACCGCCGCGGTGGTGGTGGTG  |
|                      |  | GCGAATTCCTAATACATGTCCATGTGTATGGCC   |
| 35S:ZmMADS4<br>7(Mu) |  | CGCCCCGGGATGGTCGGGACCGGGAAGA        |
|                      |  | GCGAATTCAGTCCCAGCCTGAGCGATGTGT      |
